# Supplementary material
Source: PubMed Central journal article supplement (PMC526279)
Supplement: pnas_101_46_16109__2.pdf [file pnas_101_46_16109__2.pdf]

**Table 1. Greenhouse gas histories**

| Year | CO <sub>2</sub><br>(ppm) | CH <sub>4</sub><br>(ppb) | N <sub>2</sub> O<br>(ppb) | CFC-11<br>(ppt) | CFC-12<br>(ppt) | Others*<br>(ppt) | Year | CO <sub>2</sub><br>(ppm) | CH <sub>4</sub><br>(ppb) | N <sub>2</sub> O<br>(ppb) | CFC-11<br>(ppt) | CFC-12<br>(ppt) | Others*<br>(ppt) |
|------|--------------------------|--------------------------|---------------------------|-----------------|-----------------|------------------|------|--------------------------|--------------------------|---------------------------|-----------------|-----------------|------------------|
| 1850 | 285.2                    | 791                      | 275.4                     | 0               | 0               | 0                | 1927 | 306.2                    | 1019                     | 284.5                     | 0               | 0               | 0                |
| 1851 | 285.1                    | 792                      | 275.5                     | 0               | 0               | 0                | 1928 | 306.6                    | 1025                     | 284.6                     | 0               | 0               | 0                |
| 1852 | 285.0                    | 794                      | 275.6                     | 0               | 0               | 0                | 1929 | 307.1                    | 1031                     | 284.8                     | 0               | 0               | 0                |
| 1853 | 285.0                    | 795                      | 275.7                     | 0               | 0               | 0                | 1930 | 307.5                    | 1036                     | 285.0                     | 0               | 0               | 1                |
| 1854 | 284.9                    | 797                      | 275.8                     | 0               | 0               | 0                | 1931 | 308.0                    | 1042                     | 285.1                     | 0               | 0               | 1                |
| 1855 | 285.1                    | 798                      | 275.9                     | 0               | 0               | 0                | 1932 | 308.3                    | 1047                     | 285.3                     | 0               | 0               | 2                |
| 1856 | 285.4                    | 799                      | 276.0                     | 0               | 0               | 0                | 1933 | 308.9                    | 1053                     | 285.5                     | 0               | 0               | 2                |
| 1857 | 285.6                    | 801                      | 276.1                     | 0               | 0               | 0                | 1934 | 309.3                    | 1058                     | 285.7                     | 0               | 0               | 3                |
| 1858 | 285.9                    | 802                      | 276.2                     | 0               | 0               | 0                | 1935 | 309.7                    | 1063                     | 285.9                     | 0               | 0               | 3                |
| 1859 | 286.1                    | 804                      | 276.3                     | 0               | 0               | 0                | 1936 | 310.1                    | 1068                     | 286.1                     | 0               | 0               | 3                |
| 1860 | 286.4                    | 805                      | 276.4                     | 0               | 0               | 0                | 1937 | 310.6                    | 1073                     | 286.3                     | 0               | 0               | 4                |
| 1861 | 286.6                    | 807                      | 276.5                     | 0               | 0               | 0                | 1938 | 311.0                    | 1078                     | 286.4                     | 0               | 1               | 4                |
| 1862 | 286.7                    | 808                      | 276.6                     | 0               | 0               | 0                | 1939 | 311.3                    | 1083                     | 286.6                     | 0               | 1               | 5                |
| 1863 | 286.8                    | 810                      | 276.7                     | 0               | 0               | 0                | 1940 | 311.3                    | 1088                     | 286.7                     | 0               | 1               | 5                |
| 1864 | 286.9                    | 811                      | 276.8                     | 0               | 0               | 0                | 1941 | 311.0                    | 1094                     | 286.9                     | 0               | 1               | 6                |
| 1865 | 287.0                    | 813                      | 276.9                     | 0               | 0               | 0                | 1942 | 310.7                    | 1099                     | 287.1                     | 0               | 2               | 7                |
| 1866 | 287.1                    | 815                      | 277.0                     | 0               | 0               | 0                | 1943 | 310.5                    | 1104                     | 287.3                     | 0               | 2               | 8                |
| 1867 | 287.2                    | 816                      | 277.1                     | 0               | 0               | 0                | 1944 | 310.2                    | 1109                     | 287.5                     | 0               | 3               | 9                |
| 1868 | 287.4                    | 818                      | 277.2                     | 0               | 0               | 0                | 1945 | 310.2                    | 1115                     | 287.8                     | 0               | 4               | 10               |
| 1869 | 287.5                    | 819                      | 277.3                     | 0               | 0               | 0                | 1946 | 310.3                    | 1120                     | 288.0                     | 0               | 4               | 11               |
| 1870 | 287.7                    | 821                      | 277.4                     | 0               | 0               | 0                | 1947 | 310.4                    | 1127                     | 288.3                     | 0               | 5               | 12               |
| 1871 | 287.9                    | 823                      | 277.4                     | 0               | 0               | 0                | 1948 | 310.5                    | 1133                     | 288.5                     | 0               | 7               | 13               |
| 1872 | 288.0                    | 824                      | 277.5                     | 0               | 0               | 0                | 1949 | 310.9                    | 1140                     | 288.8                     | 1               | 8               | 14               |
| 1873 | 288.2                    | 826                      | 277.6                     | 0               | 0               | 0                | 1950 | 311.3                    | 1147                     | 289.0                     | 1               | 9               | 15               |
| 1874 | 288.4                    | 827                      | 277.7                     | 0               | 0               | 0                | 1951 | 311.8                    | 1155                     | 289.2                     | 1               | 11              | 16               |
| 1875 | 288.6                    | 829                      | 277.8                     | 0               | 0               | 0                | 1952 | 312.2                    | 1163                     | 289.4                     | 2               | 13              | 17               |
| 1876 | 288.7                    | 831                      | 277.8                     | 0               | 0               | 0                | 1953 | 312.6                    | 1173                     | 289.7                     | 2               | 15              | 17               |
| 1877 | 288.9                    | 832                      | 277.9                     | 0               | 0               | 0                | 1954 | 313.2                    | 1182                     | 289.9                     | 3               | 17              | 18               |
| 1878 | 289.5                    | 834                      | 278.0                     | 0               | 0               | 0                | 1955 | 313.7                    | 1192                     | 290.1                     | 4               | 20              | 19               |
| 1879 | 290.1                    | 835                      | 278.1                     | 0               | 0               | 0                | 1956 | 314.2                    | 1202                     | 290.4                     | 5               | 23              | 20               |
| 1880 | 290.8                    | 837                      | 278.2                     | 0               | 0               | 0                | 1957 | 314.8                    | 1213                     | 290.6                     | 7               | 26              | 21               |
| 1881 | 291.4                    | 839                      | 278.3                     | 0               | 0               | 0                | 1958 | 315.3                    | 1224                     | 290.8                     | 8               | 30              | 21               |
| 1882 | 292.0                    | 841                      | 278.4                     | 0               | 0               | 0                | 1959 | 316.2                    | 1235                     | 291.1                     | 9               | 34              | 22               |
| 1883 | 292.5                    | 843                      | 278.5                     | 0               | 0               | 0                | 1960 | 317.1                    | 1247                     | 291.4                     | 11              | 38              | 23               |
| 1884 | 292.9                    | 845                      | 278.6                     | 0               | 0               | 0                | 1961 | 317.7                    | 1259                     | 291.7                     | 13              | 43              | 25               |
| 1885 | 293.3                    | 846                      | 278.7                     | 0               | 0               | 0                | 1962 | 318.4                    | 1272                     | 291.9                     | 16              | 49              | 26               |
| 1886 | 293.8                    | 848                      | 278.8                     | 0               | 0               | 0                | 1963 | 319.1                    | 1285                     | 292.2                     | 19              | 56              | 27               |
| 1887 | 294.0                    | 850                      | 278.9                     | 0               | 0               | 0                | 1964 | 319.6                    | 1298                     | 292.6                     | 23              | 63              | 29               |
| 1888 | 294.1                    | 852                      | 278.9                     | 0               | 0               | 0                | 1965 | 320.2                    | 1312                     | 293.0                     | 28              | 72              | 31               |
| 1889 | 294.2                    | 854                      | 279.0                     | 0               | 0               | 0                | 1966 | 321.6                    | 1326                     | 293.4                     | 33              | 82              | 35               |
| 1890 | 294.4                    | 856                      | 279.1                     | 0               | 0               | 0                | 1967 | 322.3                    | 1340                     | 293.8                     | 39              | 93              | 39               |
| 1891 | 294.6                    | 858                      | 279.2                     | 0               | 0               | 0                | 1968 | 323.0                    | 1355                     | 294.2                     | 45              | 105             | 44               |
| 1892 | 294.8                    | 861                      | 279.3                     | 0               | 0               | 0                | 1969 | 324.2                    | 1370                     | 294.7                     | 53              | 119             | 48               |
| 1893 | 294.7                    | 863                      | 279.4                     | 0               | 0               | 0                | 1970 | 325.5                    | 1386                     | 295.2                     | 62              | 133             | 52               |
| 1894 | 294.8                    | 865                      | 279.4                     | 0               | 0               | 0                | 1971 | 326.4                    | 1401                     | 295.7                     | 71              | 148             | 59               |
| 1895 | 294.8                    | 867                      | 279.5                     | 0               | 0               | 0                | 1972 | 327.5                    | 1417                     | 296.2                     | 82              | 166             | 65               |
| 1896 | 294.9                    | 870                      | 279.5                     | 0               | 0               | 0                | 1973 | 329.4                    | 1433                     | 296.8                     | 95              | 185             | 71               |
| 1897 | 294.9                    | 872                      | 279.6                     | 0               | 0               | 0                | 1974 | 330.2                    | 1449                     | 297.4                     | 108             | 204             | 78               |
| 1898 | 294.9                    | 874                      | 279.7                     | 0               | 0               | 0                | 1975 | 331.4                    | 1465                     | 298.0                     | 118             | 221             | 85               |
| 1899 | 295.3                    | 877                      | 279.7                     | 0               | 0               | 0                | 1976 | 331.9                    | 1481                     | 298.6                     | 129             | 237             | 93               |
| 1900 | 295.7                    | 879                      | 279.8                     | 0               | 0               | 0                | 1977 | 333.7                    | 1497                     | 299.4                     | 140             | 255             | 102              |
| 1901 | 296.2                    | 883                      | 279.9                     | 0               | 0               | 0                | 1978 | 335.4                    | 1514                     | 300.0                     | 148             | 269             | 110              |
| 1902 | 296.6                    | 887                      | 280.0                     | 0               | 0               | 0                | 1979 | 337.1                    | 1530                     | 300.9                     | 157             | 285             | 119              |
| 1903 | 297.0                    | 891                      | 280.1                     | 0               | 0               | 0                | 1980 | 339.0                    | 1547                     | 301.2                     | 166             | 299             | 127              |
| 1904 | 297.5                    | 896                      | 280.2                     | 0               | 0               | 0                | 1981 | 340.4                    | 1567                     | 302.2                     | 174             | 319             | 137              |
| 1905 | 298.0                    | 900                      | 280.3                     | 0               | 0               | 0                | 1982 | 341.6                    | 1586                     | 303.2                     | 183             | 336             | 148              |
| 1906 | 298.4                    | 905                      | 280.4                     | 0               | 0               | 0                | 1983 | 342.5                    | 1606                     | 303.8                     | 192             | 353             | 158              |
| 1907 | 298.8                    | 909                      | 280.5                     | 0               | 0               | 0                | 1984 | 344.2                    | 1625                     | 304.5                     | 201             | 368             | 169              |
| 1908 | 299.3                    | 914                      | 280.7                     | 0               | 0               | 0                | 1985 | 345.7                    | 1638                     | 304.9                     | 212             | 385             | 179              |
| 1909 | 299.7                    | 919                      | 280.8                     | 0               | 0               | 0                | 1986 | 347.1                    | 1651                     | 306.1                     | 223             | 408             | 193              |
| 1910 | 300.1                    | 924                      | 281.0                     | 0               | 0               | 0                | 1987 | 348.9                    | 1663                     | 305.9                     | 234             | 426             | 208              |
| 1911 | 300.6                    | 928                      | 281.1                     | 0               | 0               | 0                | 1988 | 351.5                    | 1673                     | 307.0                     | 245             | 445             | 222              |
| 1912 | 301.0                    | 933                      | 281.3                     | 0               | 0               | 0                | 1989 | 353.1                    | 1684                     | 308.8                     | 255             | 463             | 237              |
| 1913 | 301.3                    | 938                      | 281.5                     | 0               | 0               | 0                | 1990 | 354.3                    | 1693                     | 309.4                     | 263             | 479             | 251              |
| 1914 | 301.4                    | 944                      | 281.6                     | 0               | 0               | 0                | 1991 | 355.7                    | 1704                     | 310.3                     | 268             | 492             | 266              |
| 1915 | 301.6                    | 949                      | 281.8                     | 0               | 0               | 0                | 1992 | 356.4                    | 1714                     | 310.4                     | 271             | 504             | 282              |
| 1916 | 302.0                    | 955                      | 282.0                     | 0               | 0               | 0                | 1993 | 357.1                    | 1715                     | 311.2                     | 272             | 511             | 288              |
| 1917 | 302.4                    | 960                      | 282.2                     | 0               | 0               | 0                | 1994 | 358.6                    | 1721                     | 311.4                     | 272             | 518             | 294              |
| 1918 | 302.8                    | 966                      | 282.5                     | 0               | 0               | 0                | 1995 | 360.7                    | 1728                     | 312.4                     | 271             | 523             | 297              |

|      |       |      |       |   |   |   |      |       |      |       |     |     |     |
|------|-------|------|-------|---|---|---|------|-------|------|-------|-----|-----|-----|
| 1919 | 303.0 | 972  | 282.7 | 0 | 0 | 0 | 1996 | 362.6 | 1730 | 313.0 | 270 | 526 | 300 |
| 1920 | 303.4 | 978  | 282.9 | 0 | 0 | 0 | 1997 | 363.5 | 1733 | 313.8 | 269 | 528 | 302 |
| 1921 | 303.7 | 983  | 283.2 | 0 | 0 | 0 | 1998 | 366.3 | 1743 | 314.5 | 267 | 531 | 304 |
| 1922 | 304.1 | 989  | 283.4 | 0 | 0 | 0 | 1999 | 368.4 | 1751 | 315.4 | 265 | 532 | 306 |
| 1923 | 304.5 | 995  | 283.6 | 0 | 0 | 0 | 2000 | 369.6 | 1752 | 316.3 | 263 | 534 | 309 |
| 1924 | 304.9 | 1001 | 283.8 | 0 | 0 | 0 | 2001 | 371.1 | 1750 | 317.0 | 261 | 535 | 312 |
| 1925 | 305.3 | 1007 | 284.0 | 0 | 0 | 0 | 2002 | 373.1 | 1752 | 317.4 | 259 | 535 | 316 |
| 1926 | 305.8 | 1013 | 284.2 | 0 | 0 | 0 | 2003 | 375.6 | 1756 | 318.0 | 257 | 535 | 319 |

---

\* Others means 11 other MPTGs.
