# Supplementary material
Source: PubMed Central journal article supplement (PMC526279)
Supplement: pnas_101_46_16109__3.pdf [file pnas_101_46_16109__3.pdf]

**Table 2. Greenhouse gas scenarios for the future**

| Year | Alternative Scen. 2°C Scen. |                          |                           |                          | Year | Alternative Scen. 2°C Scen. |                          |                           |                          | Year | Alternative Scen. 2°C Scen. |                          |                           |                          |
|------|-----------------------------|--------------------------|---------------------------|--------------------------|------|-----------------------------|--------------------------|---------------------------|--------------------------|------|-----------------------------|--------------------------|---------------------------|--------------------------|
|      | CO <sub>2</sub><br>(ppm)    | CH <sub>4</sub><br>(ppb) | N <sub>2</sub> O<br>(ppb) | CO <sub>2</sub><br>(ppm) |      | CO <sub>2</sub><br>(ppm)    | CH <sub>4</sub><br>(ppb) | N <sub>2</sub> O<br>(ppb) | CO <sub>2</sub><br>(ppm) |      | CO <sub>2</sub><br>(ppm)    | CH <sub>4</sub><br>(ppb) | N <sub>2</sub> O<br>(ppb) | CO <sub>2</sub><br>(ppm) |
| 2000 | 370.0                       | 1751                     | 316.0                     | 370.0                    | 2034 | 423.2                       | 1701                     | 337.5                     | 442.2                    | 2068 | 463.4                       | 1356                     | 355.0                     | 529.8                    |
| 2001 | 371.7                       | 1756                     | 316.7                     | 371.7                    | 2035 | 424.6                       | 1693                     | 338.0                     | 444.8                    | 2069 | 464.2                       | 1351                     | 355.5                     | 531.7                    |
| 2002 | 373.4                       | 1760                     | 317.4                     | 373.5                    | 2036 | 426.0                       | 1685                     | 338.6                     | 447.4                    | 2070 | 464.9                       | 1346                     | 356.0                     | 533.5                    |
| 2003 | 375.1                       | 1764                     | 318.1                     | 375.2                    | 2037 | 427.4                       | 1676                     | 339.2                     | 450.0                    | 2071 | 465.6                       | 1341                     | 356.5                     | 535.2                    |
| 2004 | 376.7                       | 1768                     | 318.8                     | 377.0                    | 2038 | 428.8                       | 1667                     | 339.7                     | 452.6                    | 2072 | 466.3                       | 1337                     | 357.0                     | 536.9                    |
| 2005 | 378.4                       | 1771                     | 319.5                     | 378.8                    | 2039 | 430.2                       | 1657                     | 340.3                     | 455.3                    | 2073 | 466.9                       | 1333                     | 357.5                     | 538.5                    |
| 2006 | 380.1                       | 1774                     | 320.1                     | 380.6                    | 2040 | 431.6                       | 1647                     | 340.8                     | 458.0                    | 2074 | 467.5                       | 1329                     | 358.0                     | 540.1                    |
| 2007 | 381.7                       | 1777                     | 320.8                     | 382.5                    | 2041 | 433.0                       | 1637                     | 341.3                     | 460.7                    | 2075 | 468.1                       | 1326                     | 358.5                     | 541.6                    |
| 2008 | 383.3                       | 1779                     | 321.5                     | 384.4                    | 2042 | 434.3                       | 1626                     | 341.9                     | 463.5                    | 2076 | 468.7                       | 1323                     | 359.0                     | 543.0                    |
| 2009 | 385.0                       | 1781                     | 322.1                     | 386.3                    | 2043 | 435.7                       | 1615                     | 342.4                     | 466.2                    | 2077 | 469.2                       | 1320                     | 359.5                     | 544.4                    |
| 2010 | 386.6                       | 1782                     | 322.8                     | 388.2                    | 2044 | 437.1                       | 1603                     | 342.9                     | 469.0                    | 2078 | 469.7                       | 1317                     | 360.0                     | 545.7                    |
| 2011 | 388.2                       | 1783                     | 323.5                     | 390.2                    | 2045 | 438.4                       | 1591                     | 343.5                     | 471.8                    | 2079 | 470.2                       | 1315                     | 360.5                     | 547.0                    |
| 2012 | 389.8                       | 1784                     | 324.1                     | 392.2                    | 2046 | 439.7                       | 1579                     | 344.0                     | 474.6                    | 2080 | 470.7                       | 1313                     | 361.0                     | 548.2                    |
| 2013 | 391.4                       | 1784                     | 324.8                     | 394.2                    | 2047 | 441.1                       | 1566                     | 344.5                     | 477.5                    | 2081 | 471.1                       | 1311                     | 361.5                     | 549.4                    |
| 2014 | 393.0                       | 1784                     | 325.4                     | 396.2                    | 2048 | 442.4                       | 1553                     | 345.0                     | 480.4                    | 2082 | 471.5                       | 1309                     | 362.0                     | 550.4                    |
| 2015 | 394.6                       | 1783                     | 326.0                     | 398.3                    | 2049 | 443.7                       | 1540                     | 345.5                     | 483.3                    | 2083 | 471.9                       | 1308                     | 362.5                     | 551.5                    |
| 2016 | 396.2                       | 1782                     | 326.7                     | 400.4                    | 2050 | 445.0                       | 1526                     | 346.0                     | 486.2                    | 2084 | 472.3                       | 1307                     | 363.0                     | 552.4                    |
| 2017 | 397.7                       | 1781                     | 327.3                     | 402.5                    | 2051 | 446.3                       | 1512                     | 346.5                     | 489.2                    | 2085 | 472.6                       | 1306                     | 363.5                     | 553.4                    |
| 2018 | 399.3                       | 1779                     | 328.0                     | 404.6                    | 2052 | 447.5                       | 1499                     | 347.0                     | 492.0                    | 2086 | 472.9                       | 1305                     | 364.0                     | 554.2                    |
| 2019 | 400.9                       | 1777                     | 328.6                     | 406.8                    | 2053 | 448.8                       | 1487                     | 347.5                     | 494.8                    | 2087 | 473.2                       | 1304                     | 364.5                     | 555.0                    |
| 2020 | 402.4                       | 1775                     | 329.2                     | 409.0                    | 2054 | 449.9                       | 1475                     | 348.0                     | 497.6                    | 2088 | 473.5                       | 1303                     | 365.0                     | 555.8                    |
| 2021 | 403.9                       | 1772                     | 329.8                     | 411.2                    | 2055 | 451.1                       | 1463                     | 348.5                     | 500.3                    | 2089 | 473.7                       | 1302                     | 365.5                     | 556.4                    |
| 2022 | 405.5                       | 1769                     | 330.4                     | 413.5                    | 2056 | 452.2                       | 1452                     | 349.0                     | 502.9                    | 2090 | 474.0                       | 1302                     | 366.0                     | 557.0                    |
| 2023 | 407.0                       | 1765                     | 331.0                     | 415.7                    | 2057 | 453.3                       | 1442                     | 349.5                     | 505.5                    | 2091 | 474.2                       | 1302                     | 366.5                     | 557.6                    |
| 2024 | 408.5                       | 1762                     | 331.6                     | 418.0                    | 2058 | 454.4                       | 1432                     | 350.0                     | 508.0                    | 2092 | 474.3                       | 1301                     | 367.0                     | 558.1                    |
| 2025 | 410.0                       | 1757                     | 332.2                     | 420.3                    | 2059 | 455.4                       | 1422                     | 350.5                     | 510.4                    | 2093 | 474.5                       | 1301                     | 367.5                     | 558.6                    |
| 2026 | 411.5                       | 1753                     | 332.8                     | 422.6                    | 2060 | 456.4                       | 1413                     | 351.0                     | 512.8                    | 2094 | 474.6                       | 1301                     | 368.0                     | 558.9                    |
| 2027 | 413.0                       | 1747                     | 333.4                     | 425.0                    | 2061 | 457.4                       | 1404                     | 351.5                     | 515.1                    | 2095 | 474.7                       | 1301                     | 368.5                     | 559.3                    |
| 2028 | 414.5                       | 1742                     | 334.0                     | 427.4                    | 2062 | 458.4                       | 1396                     | 352.0                     | 517.4                    | 2096 | 474.8                       | 1301                     | 369.0                     | 559.5                    |
| 2029 | 415.9                       | 1736                     | 334.6                     | 429.8                    | 2063 | 459.3                       | 1389                     | 352.5                     | 519.6                    | 2097 | 474.9                       | 1301                     | 369.5                     | 559.7                    |
| 2030 | 417.4                       | 1730                     | 335.2                     | 432.2                    | 2064 | 460.2                       | 1381                     | 353.0                     | 521.8                    | 2098 | 475.0                       | 1301                     | 370.0                     | 559.9                    |
| 2031 | 418.9                       | 1723                     | 335.8                     | 434.7                    | 2065 | 461.0                       | 1375                     | 353.5                     | 523.9                    | 2099 | 475.0                       | 1301                     | 370.5                     | 560.0                    |
| 2032 | 420.3                       | 1716                     | 336.4                     | 437.2                    | 2066 | 461.9                       | 1368                     | 354.0                     | 525.9                    | 2100 | 475.0                       | 1301                     | 371.0                     | 560.0                    |
| 2033 | 421.7                       | 1709                     | 336.9                     | 439.7                    | 2067 | 462.7                       | 1362                     | 354.5                     | 527.9                    |      |                             |                          |                           |                          |
